# Supplementary material
Source: publisher site journal article supplement (https://www.spandidos-publications.com/6518/downloadSupplementary)
Supplement: Supplementary file 1 [file downloadSupplementary]

Table SI. Primer sequences used for quantitative PCR.

| Gene    | Primer sequence (5' to 3') |                          |
|---------|----------------------------|--------------------------|
|         | Forward                    | Reverse                  |
| Cyp7a1  | GTGATGTTTGAAGCCGGATATC     | TTTATGTGCGGTCTTGAACAAG   |
| Hsd3b7  | GCGCTTTGGAGGTCGTCTAT       | CGAAGACCACAGGGACTCAG     |
| Akr1d1  | ACGCTAAAGGCCCTCAAAC        | CAGCTGCCTGCGGTAAAAT      |
| Cyp27a1 | ACAGGAGGGCAAGTACCCAA       | ACCTGGTCCCCTGATTCACT     |
| Cyp39a1 | TCTCGGTTGAAGAATTTGCTTG     | TCACTAACAAAGGTCATTCCGGT  |
| Hsd17b4 | ATTTCAAATGCGTACGTGGATC     | TCGTGATATGCCATTCAAACAC   |
| Ldlr    | CAGAAGTCGACACTGTACTGAC     | AAGATGGACAGGAACCTCATAAC  |
| Trib3   | AAGATGCCTGCGTGATGACT       | CGTGGAAATGGGTATCTGCCA    |
| Fgf15   | GACTGCGAGGAGGACCAAAA       | CAGCCCGTATATCTTGCCGT     |
| Fgfr4   | CGTACACAATCTTACGTTGCTT     | CAGCGGAATTTGACAGTATTCC   |
| Klb     | GAAATCCGCGTGTTTGGTTATA     | GAAGCCGTTGTCTTGTATGATC   |
| Hmgsc1  | TGGTTCCTGGCTTCTGTCCTG      | GATCCTGGTGTGGCGTCTTGTG   |
| Hmgcr   | TGATGGGAGCTTGCTGTGAG       | TAGTGCTGGCCACAAGACAG     |
| Mvk     | CTGAAGTCAATCAACAAGTGGG     | CTCTTCAAGGAAGACATCGTCC   |
| Mvd     | GACAAGAAGCAGACGGGCAGTAC    | CGCTCAGGCACAACAGACTCAG   |
| Idi1    | ATTGAAGTACAGCTCTCCGCACAG   | CACATCTCCGCTAGAAGCTGAACC |
| Fdps    | GGATGCCATCAACGACGCTCTG     | CTCCAGCAGGTTCAAGTAGTAGGG |
| Fdft1   | GCAAGGAGAAGGACCGACAA       | GTCCCAGTCTCTGTTTGGAGG    |
| Sqle    | GTGCAGAAAAGAAATCGGTCTT     | TGTCGGGCTCTTTTAAATCTCT   |
| Osc     | GTCGGCAGAGATGGACTTATTA     | GCTTTTGGTAAGTCCGTGAAAT   |
| Dhcr7   | TGCTGCTTTATTCCTGGCTTCCTG   | GCTGGAGTAATGGCACCTTCTTGG |
| Cyp51a1 | CGCAGGCTGTCAAAGAACC        | CCTCATCTGTTAGAGGACGCC    |
| Gapdh   | GCATCCACTGGTGCTGCC         | TCATCATACTTGGCAGGTTTC    |

Cyp7/27/39a1, cytochrome P450 family 7/27/39 subfamily A member 1; Hsd3b7, hydroxy- $\delta$ -5-steroid dehydrogenase, 3  $\beta$ - and steroid  $\delta$ -isomerase 7; Akrl1d1, aldo-keto reductase family 1 member D1; Hsd17b4, hydroxysteroid 17-b dehydrogenase 4; Ldlr, low density lipoprotein receptor; Trib3, tribbles pseudokinase 3; Fgf15, fibroblast growth factor 15; Fgfr4, FGF receptor 4; Klb, Klotho  $\beta$ ; Hmgsc1, 3-hydroxy-3-methylglutaryl-CoA synthase 1; Hmgcr, 3-hydroxy-3-methylglutaryl-CoA reductase; Mvk, mevalonate kinase; Mvd, mevalonate diphosphate decarboxylase; Idi1, isopentenyl-diphosphate  $\delta$  isomerase 1; Fdps, farnesyl diphosphate synthase; Fdft1, farnesyl diphosphate farnesyltransferase 1; Sqle, squalene epoxidase; Osc, oxidosqualene-lanosterol cyclase; Dhcr7, 7-dehydrocholesterol reductase.
